# Supplementary material for: Attempts to Limit Censoring in Measures of Patient Satisfaction
Source: PubMed Central journal article supplement — J Patient Exp. 2020 Jun 11;7(6):1094–100. doi: 10.1177/2374373520930468 (PMC7786736; doi:10.1177/2374373520930468), 2020-06-11
Supplement: JPX_Suppmaterial.pdf [file JPX_Suppmaterial.pdf]

### Appendix 1. Diagnoses and frequencies.

| Diagnoses, N=212                | Frequency | Diagnoses                             | Frequency |
|---------------------------------|-----------|---------------------------------------|-----------|
| Trigger finger                  | 16 (7.5)  | <i>Continued</i>                      |           |
| CTS                             | 14 (6.6)  | CTS and trigger thumb                 | 1 (0.47)  |
| Ganglion cyst                   | 11 (5.2)  | CubTS and ganglion cyst               | 1 (0.47)  |
| Knee arthritis                  | 11 (5.2)  | Distal humerus fracture               | 1 (0.47)  |
| Finger fracture                 | 9 (4.2)   | DRF malunion                          | 1 (0.47)  |
| Rotator cuff tear               | 9 (4.2)   | Dog bite finger                       | 1 (0.47)  |
| Anterior cruciate ligament tear | 7 (3.3)   | DRF and scaphoid fracture             | 1 (0.47)  |
| DRF                             | 7 (3.3)   | DRF and finger fracture               | 1 (0.47)  |
| Shoulder pain                   | 6 (2.8)   | Dupuytren disease                     | 1 (0.47)  |
| Knee pain                       | 5 (2.4)   | Dupuytren disease and gout            | 1 (0.47)  |
| CubTS                           | 4 (1.9)   | Elbow pain                            | 1 (0.47)  |
| De Quervain tenosynovitis       | 4 (1.9)   | Excision hook of hamate               | 1 (0.47)  |
| Mallet finger                   | 4 (1.9)   | Extensor indicis proprius tendon tear | 1 (0.47)  |
| Meniscus tear                   | 4 (1.9)   | Extensor tendinitis thumb             | 1 (0.47)  |

|                           |          |                                     |          |
|---------------------------|----------|-------------------------------------|----------|
| Bilateral arthritis hands | 3 (1.4)  | Extensor tendon tear finger         | 1 (0.47) |
| Labral tear shoulder      | 3 (1.4)  | Fibula fracture                     | 1 (0.47) |
| Mass arm                  | 3 (1.4)  | Finger fracture and wrist arthritis | 1 (0.47) |
| MCP fracture              | 3 (1.4)  | Finger sprain                       | 1 (0.47) |
| Scaphoid fracture         | 3 (1.4)  | Foot Fracture                       | 1 (0.47) |
| Arm pain                  | 2 (0.94) | Frozen shoulder                     | 1 (0.47) |
| Basal joint arthritis     | 2 (0.94) | Hamstring tear                      | 1 (0.47) |
| Bilateral pain hands      | 2 (0.94) | Hand laceration                     | 1 (0.47) |
| CMC arthritis             | 2 (0.94) | Hip pain                            | 1 (0.47) |
| Finger laceration         | 2 (0.94) | Intersection syndrome               | 1 (0.47) |
| Finger mass               | 2 (0.94) | Knee and ankle pain                 | 1 (0.47) |
| Herniated disc            | 2 (0.94) | Knee sprain                         | 1 (0.47) |
| Paronychia                | 2 (0.94) | Lumbar spine injury                 | 1 (0.47) |
| Plantar fasciitis         | 2 (0.94) | Malleolus fracture                  | 1 (0.47) |
| Radiculopathy             | 2 (0.94) | Medial patellofemoral ligament tear | 1 (0.47) |
| Radius fracture           | 2 (0.94) | Meniscus tear and wrist sprain      | 1 (0.47) |

|                                        |          |                                           |          |
|----------------------------------------|----------|-------------------------------------------|----------|
| Shoulder arthritis                     | 2 (0.94) | Metatarsal stress fracture                | 1 (0.47) |
| TFCC tear                              | 2 (0.94) | Neck and back pain                        | 1 (0.47) |
| Ulnar collateral ligament tear finger  | 2 (0.94) | Olecranon bursitis                        | 1 (0.47) |
| Wrist pain                             | 2 (0.94) | Osteoarthritis                            | 1 (0.47) |
| 4th extensor compartment tenosynovitis | 1 (0.47) | Osteomyelitis after cat bite fore arm     | 1 (0.47) |
| AC joint arthritis                     | 1 (0.47) | Plantar fasciitis and peroneal tendonitis | 1 (0.47) |
| Achilles tendon rupture                | 1 (0.47) | Proximal interphalangeal joint fusion     | 1 (0.47) |
| Ankle pain                             | 1 (0.47) | Proximal radius fracture                  | 1 (0.47) |
| Back pain                              | 1 (0.47) | Shoulder impingement                      | 1 (0.47) |
| Bicep tendon tear                      | 1 (0.47) | Stress fracture knee                      | 1 (0.47) |
| Carpal boss                            | 1 (0.47) | Talus fracture                            | 1 (0.47) |
| Central slip injury finger             | 1 (0.47) | Tennis elbow                              | 1 (0.47) |
| Chondromalacia patella                 | 1 (0.47) | Thumb arthritis                           | 1 (0.47) |
| Common extensor tendon tear            | 1 (0.47) | Toe fracture                              | 1 (0.47) |
| CTS and tennis elbow                   | 1 (0.47) | Trigger finger and De Quervain disease    | 1 (0.47) |
| CTS and trigger finger                 | 1 (0.47) | Ulnar artery reconstruction finger        | 1 (0.47) |

---

---

Discrete variables as number (percentage); AC: Acromioclavicular; CMC: Carpometacarpal; CTS: Carpal tunnel syndrome; CubTS: Cubital tunnel syndrome; DRF: Distal radius fracture; MCP: Metacarpophalangeal; TFCC: Triangular fibrocartilage complex.
